# Supplementary material for: Development and Characterization of a Hydrogel Containing Curcumin-Loaded Nanoemulsion for Enhanced In Vitro Antibacteria and In Vivo Wound Healing
Source: MDPI journal article supplement (doi:10.3390/molecules28176433), 2023-09-04
Supplement: s1 [file s1]

# Development and Characterization of a Hydrogel Containing Curcumin-Loaded Nanoemulsion for Enhanced In Vitro Antibacteria and In Vivo Wound Healing

Thi Thanh Ngoc Le <sup>1</sup>, Thi Kieu Nhi Nguyen <sup>1</sup>, Van Minh Nguyen <sup>2</sup>, Thi Cam Minh Dao <sup>1</sup>, Hoai Bao Chau Nguyen <sup>1</sup>, Cong Thuan Dang <sup>3</sup>, Thi Bao Chi Le <sup>4</sup>, Thi Khanh Linh Nguyen <sup>4</sup>, Phuong Thao Tien Nguyen <sup>3</sup>, Le Hoang Nam Dang <sup>5</sup>, Van Minh Doan <sup>6</sup> and Hoang Nhan Ho <sup>1,\*</sup>

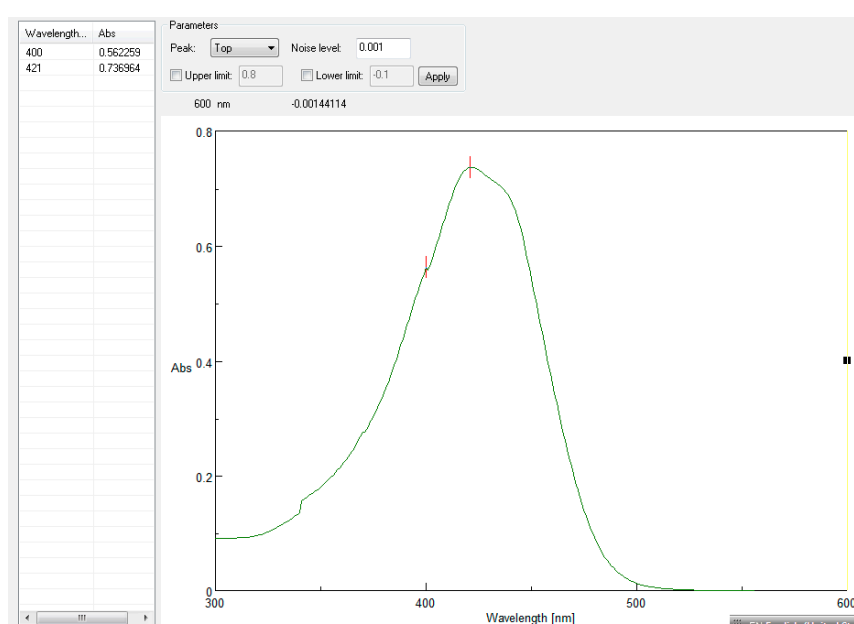

**Figure S1. UV-Vis spectrum of standard curcumin in methanol**

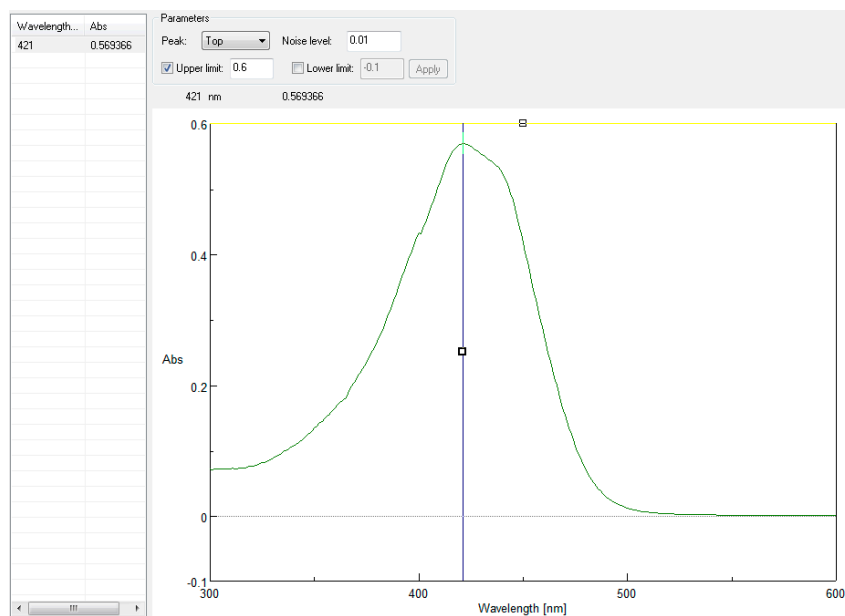

**Figure S2. UV-Vis spectrum of curcumin material in methanol**

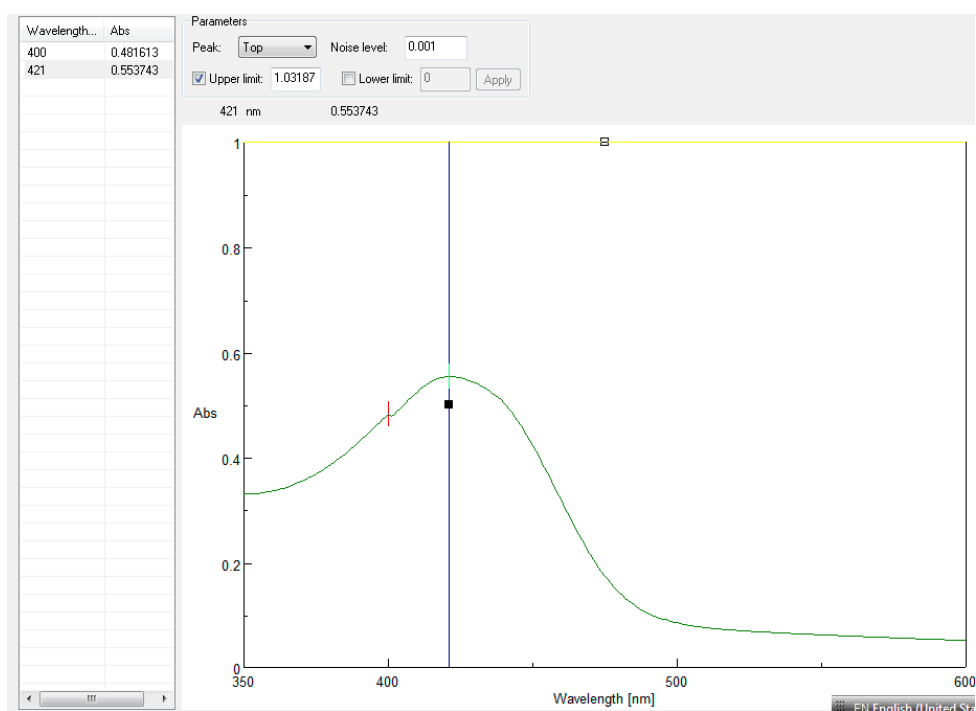

**Figure S3. UV-Vis spectrum of a commercial gel containing nanosized curcumin in methanol**

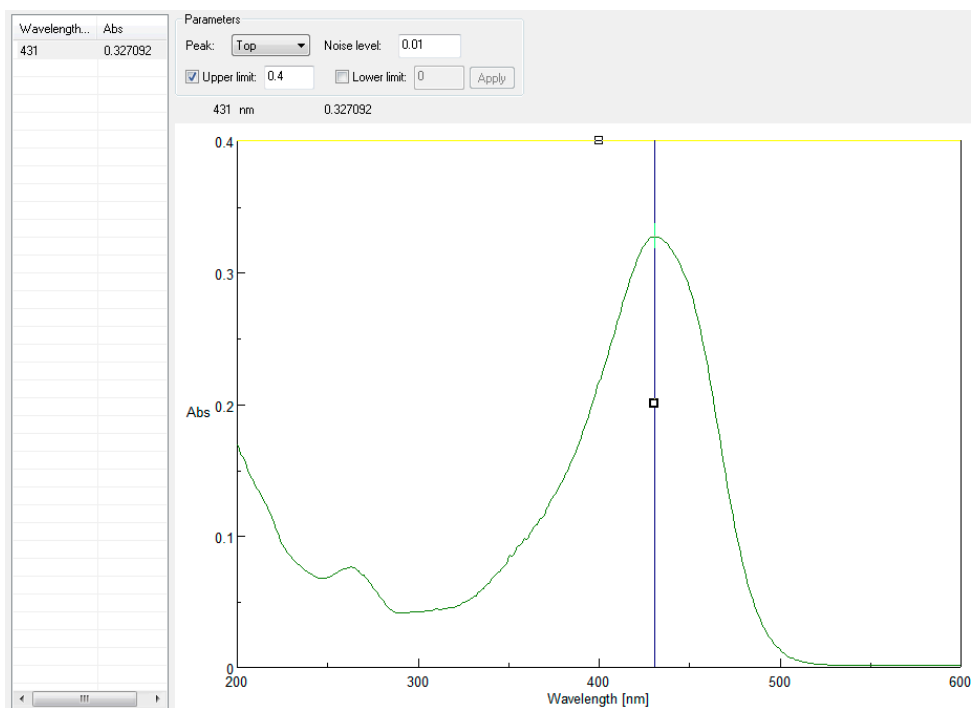

**Figure S4. UV-Vis spectrum of curcumin in *in vitro* release media**
